# Supplementary material
Source: PubMed Central journal article supplement (PMC7228563)
Supplement: jitc-2020-000930supp001.pdf [file jitc-2020-000930supp001.pdf]

SITC IL-6 Supplemental Table 1

| Target                     | Modulating agent          | Regulatory Status                        | Brand Name | Manufacturer                               | MOA/Comments                                                            |
|----------------------------|---------------------------|------------------------------------------|------------|--------------------------------------------|-------------------------------------------------------------------------|
| <b>IL-6 Modulation</b>     |                           |                                          |            |                                            |                                                                         |
| IL-6                       | tocilizumab               | FDA-approved                             | Actemra    | Genentech                                  | Humanized anti-IL-6R mAb (receptor antagonist)                          |
| IL-6                       | siltuximab (CNTO 328)     | FDA-approved                             | Sylvant    | EUSA Pharma                                | Chimeric anti IL-6 mAb                                                  |
| IL-6                       | sarilumab                 | FDA-approved                             | Kevzara    | Regeneron                                  | Human anti-IL-6R mAb (receptor antagonist)                              |
| IL-6                       | satralizumab              | in clinical trials                       |            | Roche                                      | Humanized anti-IL-6R mAb (receptor antagonist)                          |
| IL-6                       | vobarilizumab (ALX-0061)  | in clinical trials                       |            | Ablynx                                     | Dual heavy-chain anti-IL-6R/anti-albumin nanobody (receptor antagonist) |
| IL-6                       | MEDI5117                  | in clinical trials (halted), preclinical |            | AstraZeneca (from MedImmune)               | Affinity-optimized human anti-IL-6 mAb                                  |
| IL-6                       | olokizumab (CDP6038)      | in clinical trials                       |            | R-Pharm (Moscow) licensed from UCB         | Humanized anti-IL-6 mAb                                                 |
| IL-6                       | elsilimomab (B-E8)        | in clinical trials                       |            | Diaclone (France)                          | Murine anti-IL-6 mAb                                                    |
| IL-6                       | clazakizumab (BMS-945429) | in clinical trials                       |            | Vitaeris                                   | Humanized anti-IL-6 mAb                                                 |
| IL-6                       | FE301                     | preclinical                              |            | Conaris Research Institute/Ferring         | Soluble gp130-Fc fusion protein                                         |
| IL-6                       | FM101                     | clinical trials                          |            | Femta Pharmaceuticals agreement with Lonza | Humanized anti-IL-6 mAb                                                 |
| IL-6                       | C326                      | clinical trials                          |            | Avidia                                     | anti-Fc avimer protein                                                  |
| IL-6                       | Sant7                     | clinical trials                          |            |                                            | IL-6R Receptor superantagonist                                          |
| IL-6                       | olamkicept (TJ301)        | in clinical trials                       |            | I-MAB biopharma (from Ferring)             | gp130-Fc fusion protein. Inhibits trans signaling                       |
| SOCS3                      | naringenin                |                                          |            |                                            | natural product, pleiotropic activity claimed                           |
| SOCS3                      | flavone                   |                                          |            |                                            | natural product, pleiotropic activity claimed                           |
| <b>JAK/STAT Modulation</b> |                           |                                          |            |                                            |                                                                         |

SITC IL-6 Supplemental Table 1

|          |                                     |                           |                 |                                                                                 |                                         |
|----------|-------------------------------------|---------------------------|-----------------|---------------------------------------------------------------------------------|-----------------------------------------|
| JAK/STAT | ruxolitinib                         | FDA-approved              | Jakavi/Jakafi   | Incyte/Novartis                                                                 | JAK1/2 TKI                              |
| JAK/STAT | tofacitinib                         | FDA-approved              | Xeljanz/Jakvins | Pfizer                                                                          | JAK1/3 TKI                              |
| JAK/STAT | baricitinib                         | FDA-approved              | Olumiant        | Eli-Lilly/Incyte                                                                | JAK1/2 TKI                              |
| JAK/STAT | peficitinib                         | Japan-approved            | Smyraf          | Astellas                                                                        | Pan-JAK TKI                             |
| JAK/STAT | decernotinib (VX-509)               | in clinical trials        |                 | Vertex                                                                          | JAK3 TKI                                |
| JAK/STAT | filgotinib (GLPG0634)               | in clinical trials        |                 | Galapagos NV (Belgium) and Gilead                                               | JAK1 TKI                                |
| JAK/STAT | solcitinib (GSK2586184 or GLPG0778) | in clinical trials/halted |                 | Galapagos NV (Belgium) and GSK                                                  | JAK1 TKI                                |
| JAK/STAT | itacitinib (INCB039110)             | in clinical trials        |                 | Incyte (Innovent Biologics in China)                                            | JAK1 TKI                                |
| JAK/STAT | upadacitinib                        | FDA-approved              | Rinvoq          | AbbVie                                                                          | JAK1 TKI                                |
| JAK/STAT | abrocitinib (PF-04965842)           | in clinical trials        |                 | Pfizer                                                                          | JAK1 TKI                                |
| JAK/STAT | ocacitinib                          | VETERINARY MEDICATION     | Apoquel         | Zoetis                                                                          | JAK1 TKI                                |
| JAK/STAT | PF-06651600                         | in clinical trials        |                 | Pfizer                                                                          | JAK3 TKI                                |
| JAK/STAT | BMS-986165                          | in clinical trials        |                 | BMS                                                                             | Tyk2 TKI                                |
| JAK/STAT | pacritinib                          | in clinical trials        |                 | CTI biopharma (multiple partnerships and transfers, including Baxter and Shire) | JAK2 & IRAK1 TKI                        |
| JAK/STAT | cerdulatinib                        | in clinical trials        |                 | Portola Pharmaceuticals                                                         | JAK1/3 & Syk TKI                        |
| JAK/STAT | fedratinib                          | FDA-approved              | Inrebic         | Impact Biomedicines (Celgene)                                                   | JAK1/JAK2 TKI                           |
| JAK/STAT | gandotinib (LY-2784544)             | in clinical trials        |                 | Eli-Lilly                                                                       | multikinase TKI similar to staurosporin |
| JAK/STAT | lestaurtinib (CEP-701)              | in clinical trials        |                 | Cephalon Pharmaceuticals                                                        | JAK2, FLT3 & TrkA TKI                   |
| JAK/STAT | momelotinib (GS-0387, CYT-387)      | in clinical trials        |                 | Sierra Oncology                                                                 | JAK1/2 TKI                              |

SITC IL-6 Supplemental Table 1

|                                          |                       |                                          |          |                                                                     |                                                        |
|------------------------------------------|-----------------------|------------------------------------------|----------|---------------------------------------------------------------------|--------------------------------------------------------|
| STAT3                                    | danvatirsen (AZD9150) | in clinical trials                       |          | AstraZeneca                                                         | Antisense RNA                                          |
| <b>IL-1 Modulation</b>                   |                       |                                          |          |                                                                     |                                                        |
| IL-1                                     | anakinra              | FDA-approved                             | Kineret  | Biovitrum (Sweden)                                                  | Recombinant IL-1R antagonist                           |
| IL-1                                     | rilonacept            | FDA-approved                             | Arcalyst | Regeneron                                                           | Receptor trap                                          |
| IL-1                                     | canakinumab           | FDA-approved                             | Ilaris   | Novartis                                                            | Human anti-IL-1 $\beta$ mAb                            |
| IL-1                                     | gevokizumab           | in clinical trials                       |          | Novartis ( from Xoma Corporation)                                   | Humanized anti-IL-1 $\beta$ mAb. Allosteric modulating |
| IL-1                                     | LY2189102             | in clinical trials                       |          | Eli-Lilly                                                           | Humanized anti-IL-1 $\beta$ mAb                        |
| IL-1                                     | berkemimab (MABp1)    | in clinical trials                       | Xilonix  | Xbiotech                                                            | Human anti-IL-1 $\alpha$                               |
| IL-1                                     | CYT013                | in clinical trials (halted?)             |          | (Kuros) Cytos Biotech and partnerships                              | therapeutic vaccine (diabetes)                         |
| IL-1                                     | MEDI8968              | in clinical trials (halted?)             |          | MedImmune (AZ)                                                      | Receptor antagonist. Human anti-IL-1RI mAb             |
| IL-1                                     | Isunakinra (EBI-005)  | in clinical trials                       |          | Buzzard Pharmaceuticals from Eleven Biotherapeutics (now Sesen Bio) | IL-1R inhibitor                                        |
| IL-1                                     | belnacasan (VX-765)   | in clinical trials (halted), preclinical |          | Vertex                                                              | oral caspase I inhibitor                               |
| <b>TNF<math>\alpha</math> Modulation</b> |                       |                                          |          |                                                                     |                                                        |
| TNF alpha                                | infliximab            | FDA-approved                             | Remicade | Janssen                                                             | Chimeric anti-TNF $\alpha$ mAb                         |
| TNF alpha                                | etancercept           | FDA-approved                             | Enbrel   | Amgen                                                               | Receptor trap                                          |
| TNF alpha                                | adalimumab            | FDA-approved                             | Humira   | AbbVie                                                              | Human anti-TNF $\alpha$ mAb                            |
| TNF alpha                                | certulizumab pegol    | FDA-approved                             | Cimzia   | UCB                                                                 | Pegylated humanized anti-TNF $\alpha$ mAb              |
| TNF alpha                                | golimumab             | FDA-approved                             | Simponi  | Janssen                                                             | Human anti-TNF $\alpha$ mAb                            |
| <b>IL-17/IL-23 Modulation</b>            |                       |                                          |          |                                                                     |                                                        |
| IL-17                                    | secukinumab           | FDA-approved                             | Cosentyx | Novartis                                                            | Human anti-IL-17 mAb                                   |
| IL-23                                    | ustekinumab           | FDA-approved                             | Stelara  | Janssen                                                             | Human anti-IL-12/IL-23 mAb                             |
| IL-23                                    | guselkumab            | FDA-approved                             | Tremfya  | Janssen                                                             | Human anti-IL-23 mAb                                   |
| IL-23                                    | tildrakizumab -asmn   | FDA-approved                             | Ilumya   | Sun Pharma Global                                                   | Human anti-IL-23 mAb                                   |
| IL-23                                    | risankizumab-rzaa     | FDA-approved                             | Skyrizi  | AbbVie                                                              | Humanized anti-IL-23 mAb                               |

SITC IL-6 Supplemental Table 1

|       |            |              |       |                               |                           |
|-------|------------|--------------|-------|-------------------------------|---------------------------|
| IL-17 | ixekizumab | FDA-approved | Taltz | Eli-Lilly                     | Humanized anti-IL-17A mAb |
| IL-17 | brodalumab | FDA-approved | Siliq | Valeant /LEO Pharma in Europe | Human anti-IL-17A mAb     |

DRAFT
